# Supplementary material for: Role of carrier-transfer in the optical nonlinearity of graphene/Bi2Te3 heterojunctions
Source: Royal Society of Chemistry journal article supplement (doi:10.1039/d0nr02085k), 2020-01-01
Supplement: d0nr02085k1.pdf [file d0nr02085k1.pdf]

## Electronic supplementary information (ESI)

# Role of Carrier-Transfer in the Optical Nonlinearity of Graphene/Bi<sub>2</sub>Te<sub>3</sub> Heterojunctions

Jia-Chi Lan,<sup>†a</sup> Junpeng Qiao,<sup>†a</sup> Wei-Heng Sung,<sup>†a</sup> Chun-Hu Chen,<sup>\*b</sup> Ren-Huai Jhang,<sup>b</sup> Shi-Hsin  
Lin,<sup>c</sup> Li-Ren Ng,<sup>c</sup> Gengchiao Liang,<sup>d</sup> Meng-Yu Wu,<sup>a</sup> Li-Wei Tu,<sup>e</sup> Cheng-Maw Cheng,<sup>f</sup> Hong Liu,<sup>\*g</sup>

and Chao-Kuei Lee<sup>\*aeh</sup>

<sup>a</sup>Department of Photonics, National Sun Yat-sen University, Kaohsiung, 80424, Taiwan.

E-mail: [chuckcklee@yahoo.com](mailto:chuckcklee@yahoo.com)

<sup>b</sup>Department of Chemistry, National Sun Yat-sen University, Kaohsiung, 80424, Taiwan.

E-mail: [chunhu.chen@mail.nsysu.edu.tw](mailto:chunhu.chen@mail.nsysu.edu.tw)

<sup>c</sup>Department of Materials and Optoelectronic Science, National Sun Yat-sen University,  
Kaohsiung, 80424, Taiwan.

<sup>d</sup>Department of Electrical and Computer Engineering, National University of Singapore,  
Singapore, 117583, Singapore.

<sup>e</sup>Department of Physics and Center of Crystal Research, National Sun Yat-sen University,  
Kaohsiung, 80424, Taiwan

<sup>f</sup>National Synchrotron Radiation Research Center, Hsinchu, 30076, Taiwan.

<sup>g</sup>State Key Laboratory of Crystal Materials, Shandong University, Jinan, 250100, China

E-mail: [hongliu@sdu.edu.cn](mailto:hongliu@sdu.edu.cn)

<sup>h</sup>Research Center for Applied Sciences, Academia Sinica, Taipei, 11529, Taiwan

†These authors contributed equally.

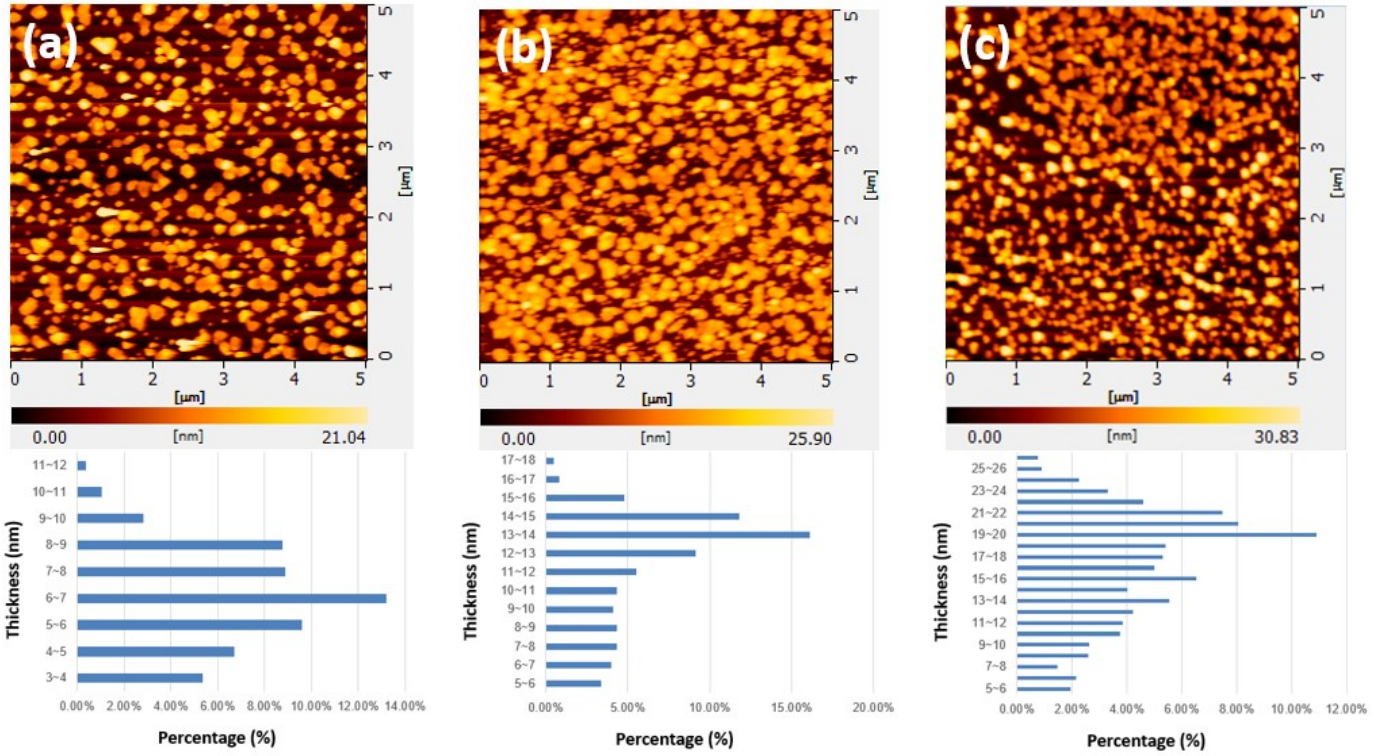

Fig. S1. AFM image and thickness distribution of (a) 6.5 nm, (b) 12.3 nm and (c) 16.5 nm  $\text{Bi}_2\text{Te}_3$  nanoplates.

X-ray photoelectron spectrum (XPS) experiment was conducted by JEOL JAMP-9500F using Mg  $\text{K}\alpha$  X-ray. Fig. S2 (a) is the wide range XPS of graphene/ $\text{Bi}_2\text{Te}_3$  heterojunction. Fig. S2 (b), (c)

and (d) are the deconvolution of C 1s, Bi 4f and Te 3d peak. In Fig. S2 (b), a peak is located at 284.03 eV, indicating the graphene C-C bonding. The Bi 4f<sub>7/2</sub> spectrum is shown in Fig. S2 (c), there is one peak located at 158.73 eV, indicating the Bi<sub>2</sub>Te<sub>3</sub> Bi-Te bonding. In Fig. S2 (d), beside the main peaks which located at 575.63 eV, the small components at 571.69 eV is stemming from surface oxidation which is commonly observed in synthesized topological insulator. Though there is little amount of oxidized state in Bi<sub>2</sub>Te<sub>3</sub> nanoplate, they would not dramatically affect the Bi<sub>2</sub>Te<sub>3</sub> electronic property. Similar results have been reported in previous study.<sup>1</sup> Therefore, one can conclude that a high-quality graphene/Bi<sub>2</sub>Te<sub>3</sub> heterojunction with little oxidation was successfully fabricated.

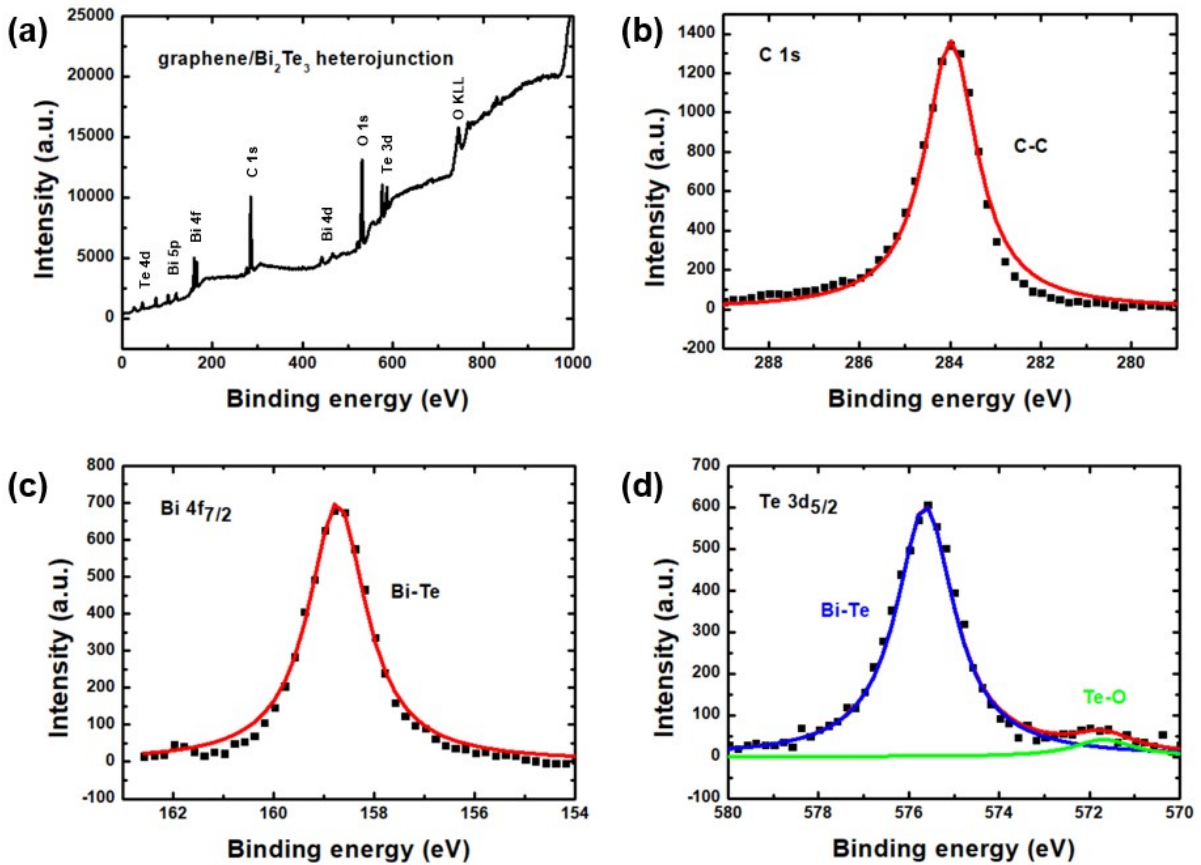

Fig. S2. (a) XPS for heterojunction of monolayer graphene with  $\text{Bi}_2\text{Te}_3$ . (b) The C 1s peak, (c) the Bi 4f peak and (d) the Te 3d peak.

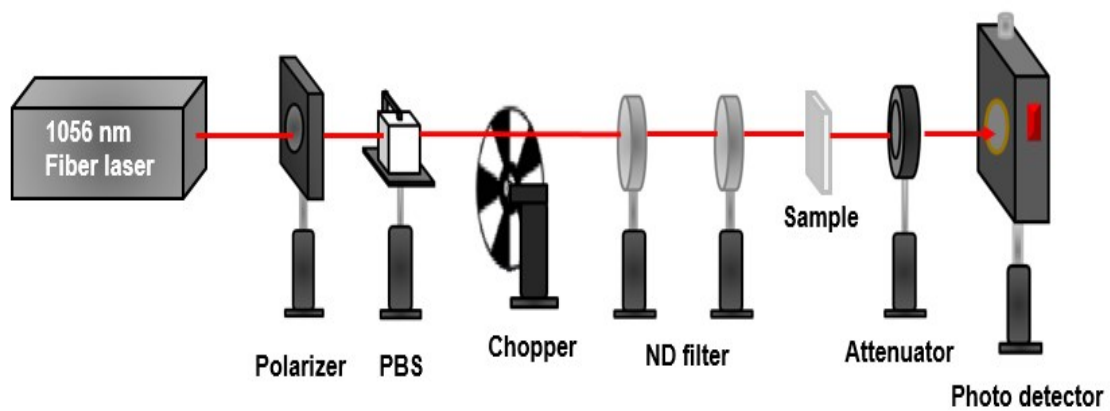

Fig. S3. Schematic of saturable absorption measurement.

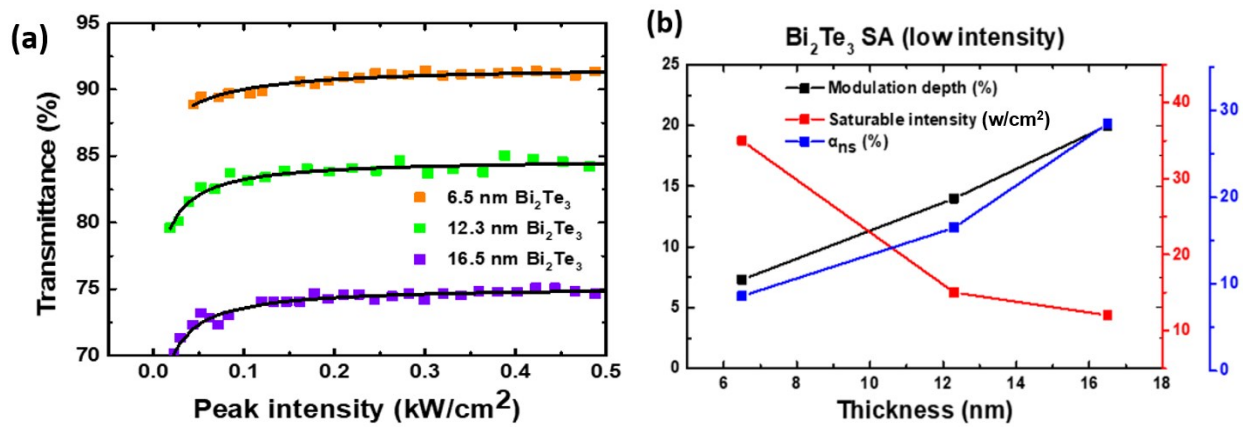

Fig. S4. (a) Nonlinear transmittances and fitting curves of 6.5 nm, 12.3 nm and 16.5 nm Bi<sub>2</sub>Te<sub>3</sub> heterojunction at low optical intensity. (b) Fitting values of modulation depth, saturable intensity and non-saturable absorption coefficient at low intensity versus Bi<sub>2</sub>Te<sub>3</sub> nanoplate thickness.

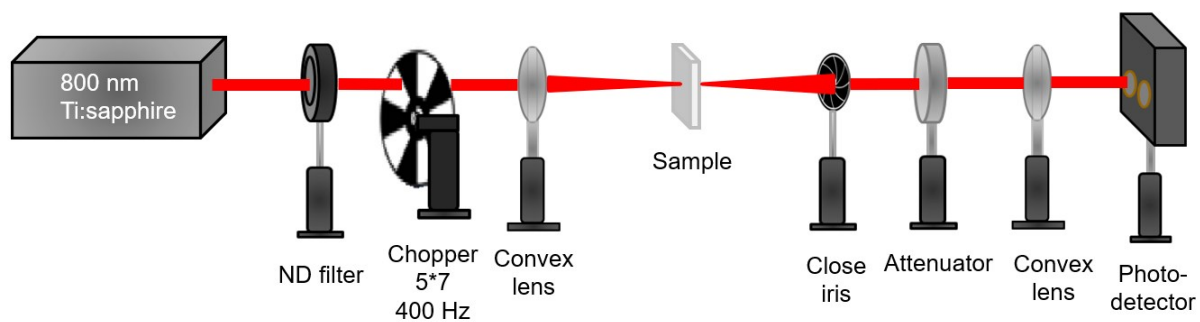

Fig. S5. Schematic of z-scan measurement.

The close aperture/open aperture data is fitted with conventional equation as bellow:

$$T_{CA/OA} = 1 + \frac{4 \times \frac{Z}{Z_R} \times \Delta\phi_0}{\left(\left(\frac{Z}{Z_R}\right)^2 + 1\right)\left(\left(\frac{Z}{Z_R}\right)^2 + 9\right)}$$

Where the  $Z$  is the sample position,  $\Delta\phi_0$  is nonlinear phase shift,  $Z_R = \pi\omega_0^2/\lambda$  is Rayleigh length,  $\omega_0$  is beam radius at focal point about  $86.3 \mu\text{m}$ ,  $\lambda$  is laser wavelength. The  $\Delta\phi_0$  of graphene/6.5 nm  $\text{Bi}_2\text{Te}_3$  heterojunction under  $98 \text{ MW/cm}^2$  is  $-0.028$ . Finally, the nonlinear refractive index  $n_2$  is:

$$n_2 = \frac{\Delta\phi_0}{I_0 \times k \times L}$$

Where the  $I_0$  is peak intensity at focal point,  $k$  is wavenumber,  $L$  is sample thickness. The  $n_2$  is then calculated about  $-5.28 \times 10^{-9} \text{ cm}^2/\text{W}$ .

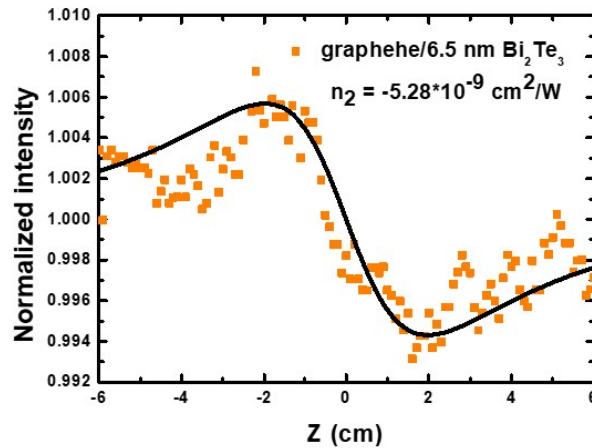

Fig. S6. Close aperture/open aperture z-scan result of graphene/6.5 nm  $\text{Bi}_2\text{Te}_3$  under  $98 \text{ MW/cm}^2$ .



### Computation of graphene/Bi<sub>2</sub>Te<sub>3</sub> heterojunction binding energy

Our first-principles calculations were performed via Vienna Ab-initio Simulation Package (VASP) to obtain the binding energy.<sup>2,3</sup> Perdew-Burke-Ernzerhof (PBE) functional and the van der Waals D3 correction were employed to describe the exchange-correlation energy.<sup>4,5</sup> We also considered the spin-orbit coupling in our calculation as Bi and Te atoms are heavy elements. In our calculation, we computed the adsorption energy within the heterojunction Bi<sub>2</sub>Te<sub>3</sub> - graphene in mono-quintuple layer (QL) and two QLs of Bi<sub>2</sub>Te<sub>3</sub>. A 2×2×1 supercell of graphene with 8 carbon atoms was stacked above the QL of Bi<sub>2</sub>Te<sub>3</sub>, resulting in 10.88% strain for Bi<sub>2</sub>Te<sub>3</sub>. The optimized crystal structure is shown in Figure S4. The binding energy of the heterojunction graphene/mono-QL Bi<sub>2</sub>Te<sub>3</sub> is -0.292 eV and the graphene/two-QLs Bi<sub>2</sub>Te<sub>3</sub> is -0.278 eV.

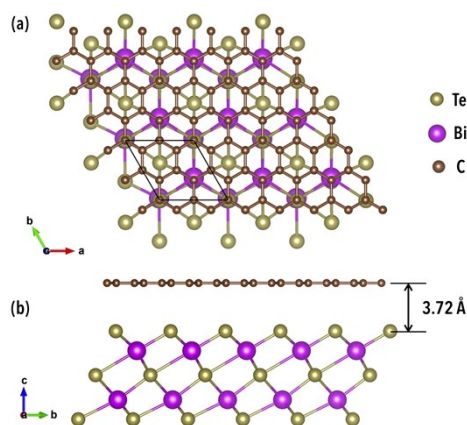

Fig. S7 (a) Top view and (b) side view of the equilibrium structure of mono-QL Bi<sub>2</sub>Te<sub>3</sub> stacking with graphene.

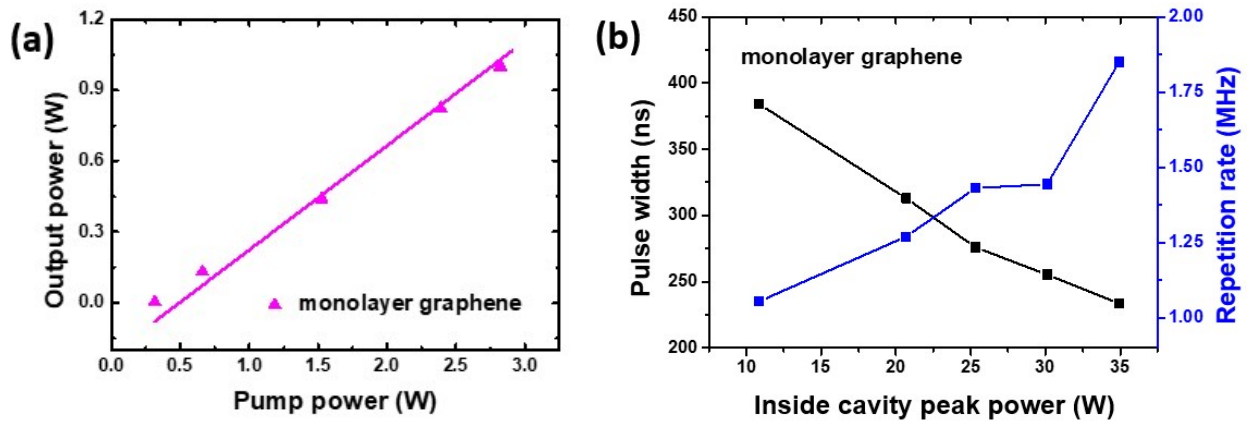

Fig. S8 (a) Average output power versus pump power of graphene. (b) Pulse width and repetition rate versus inside cavity peak power of graphene.

## REFERENCES

1. Y. H. Lin, S. F. Lin, Y. C. Chi, C. L. Wu, C. H. Cheng, W. H. Tseng, J. H. He, C. I. Wu, C. K. Lee and G. R. Lin, *ACS Photonics*, 2015, 2, 481–490.
2. H. Bando, K. Koizumi, Y. Oikawa, K. Daikohara, V. A. Kulbachinskii and H. Ozaki, *Journal of Physics: Condensed Matter*, 2000, **12**, 5607
3. Kresse, G.; Furthmüller, J. Efficiency of Ab-initio Total Energy Calculations for Metals and Semiconductors Using a Plane-Wave Basis Set. *Computational Materials Science* **1996** 6, 15–50.
4. Kresse, G.; Furthmüller, J. Efficient Iterative Schemes for ab initio Total-Energy Calculations Using a Plane-Wave Basis Set. *Physical Review B* **1996**, 54, 11169–11186.
5. Perdew, J. P.; Burke, K.; Ernzerhof, M. Generalized gradient approximation made simple. *Physical Review Letters* **1996**, 77, 3865–3868.
